# Supplementary material for: Bi-directional signaling by membrane-bound KitL induces proliferation and coordinates thymic endothelial cell and thymocyte expansion
Source: PubMed Central journal article supplement (PMC6224562; doi:10.1038/s41467-018-07024-0), 2018-11-08
Supplement: 41467_2018_7024_MOESM2_ESM.pdf [file 41467_2018_7024_MOESM2_ESM.pdf]

**Supplementary Information.**

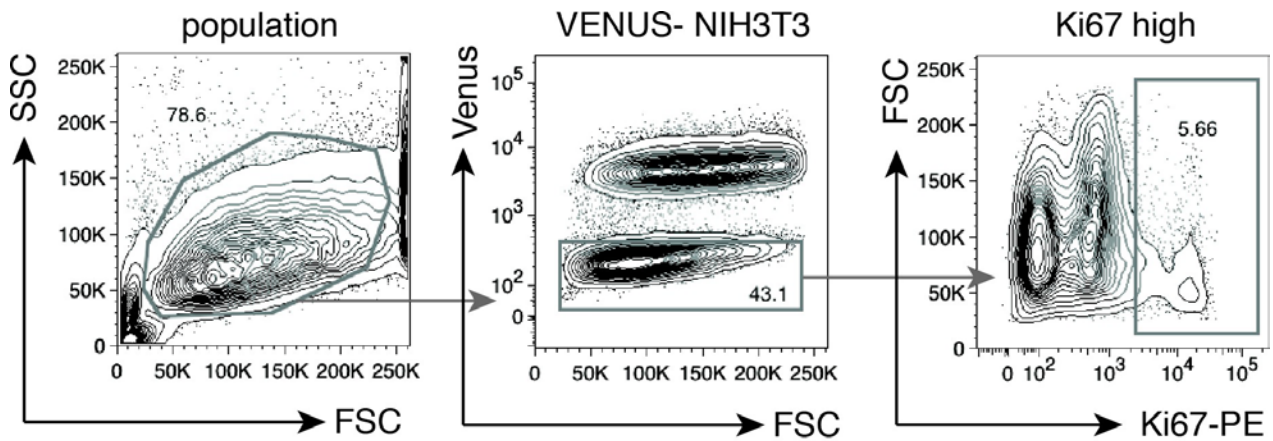

## Supplementary Figure 1

Supplementary Figure 1: Gating strategy for NIH3T3 co-cultures.

Gating strategy used to identify un-transduced NIH3T3 cells (Venus-) in co-culture experiments with Venus-expressing NIH-Venus or NIH-Kit cells (Venus+) shown in Figure 1c,d,e and Figure 2a,b,c,d,e,f,g.

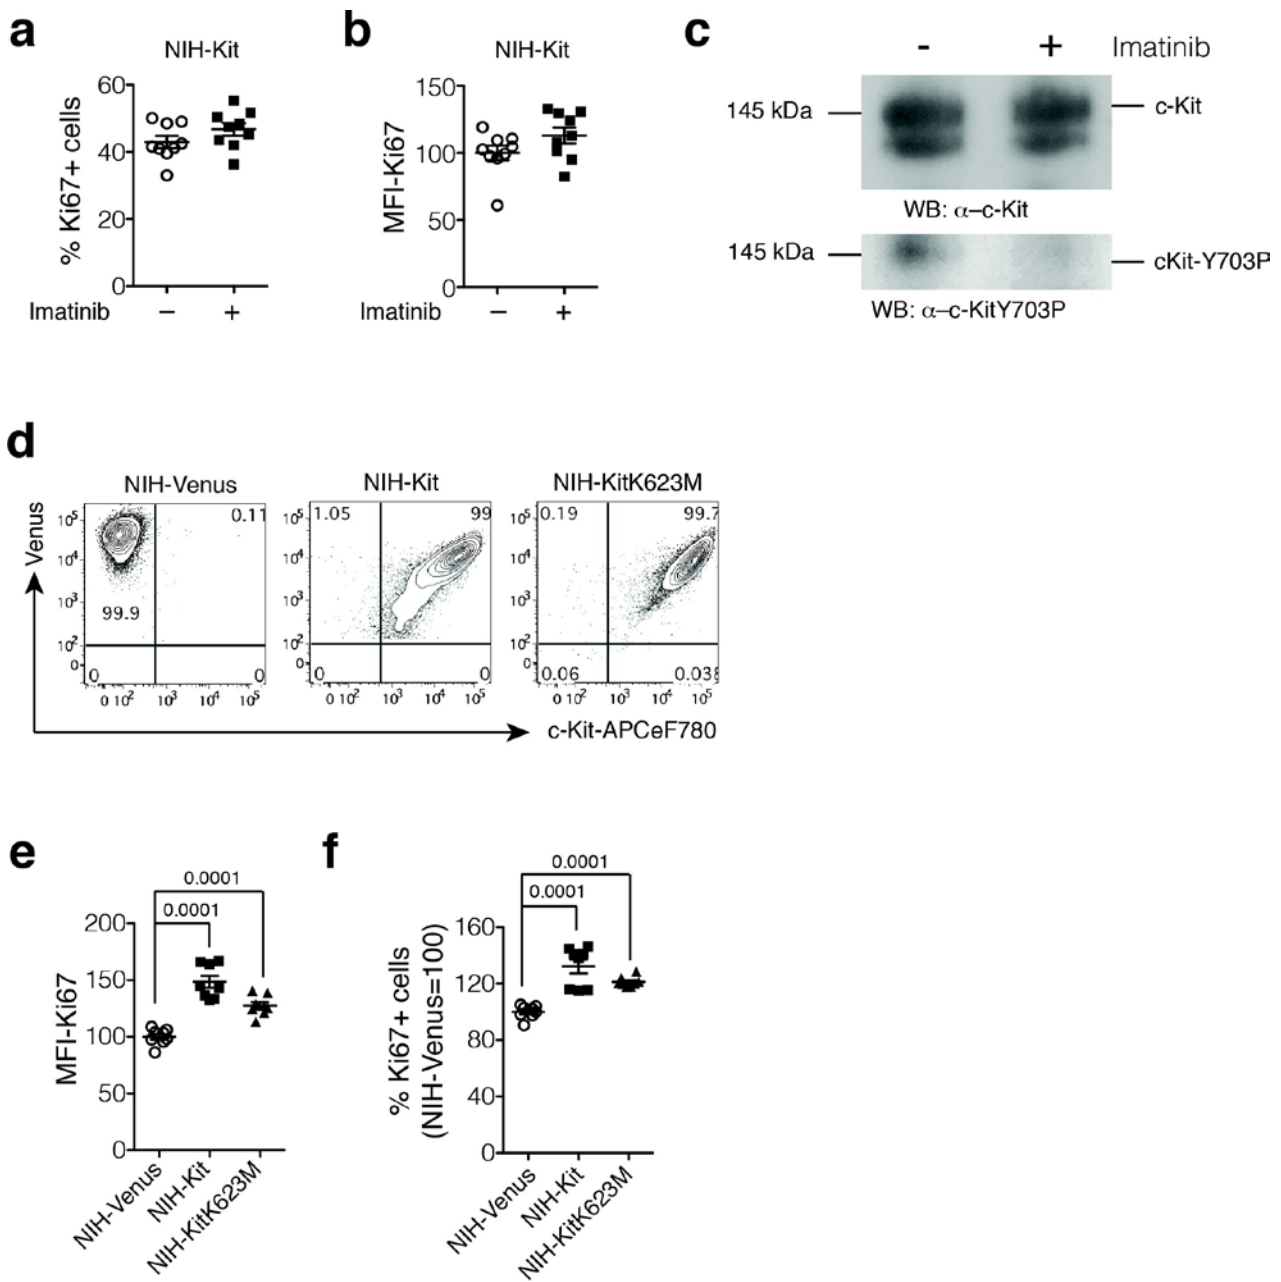

## Supplementary Figure 2

Supplementary Figure 2: Activation of c-Kit is dispensable for reverse KitL signaling in NIH3T3 cells.

- (a)** Percentage of Ki67<sup>+</sup> cells NIH3T3 co-cultured with NIH-Kit cells and NIH-Kit cells in the presence of 10  $\mu$ M Imatinib for 24 hours. (N=8 for both conditions, two experiments). Bars show mean $\pm$ s.e.m. *P* values are shown (Student's *t*-test); n.s. = not significant.

- (b)** Mean fluorescence intensity (MFI) of Ki67 signal in samples from (a). Bars show mean $\pm$ s.e.m. with NIH-Kit mean (- Imatinib) = 100. *P* values are shown (Student's t-test); n.s. = not significant.
- (c)** Western blot analysis of c-Kit (upper panel) and c-Kit-Y703P (bottom panel) from NIH-Kit treated with vehicle or Imatinib 10  $\mu$ M Imatinib for 1 hour.
- (d)** Flow cytometry plots of pRRL-Venus-transduced (left plot; NIH-Venus) and pRRL-c-Kit-Venus (right plot; NIH-Kit) and pRRL-c-KitK623M-Venus transduced NIH3T3 cells stained with anti-c-Kit antibody. Data are representative of two experiments.
- (e)** Mean fluorescence intensity (MFI) of Ki67 signal in NIH3T3 co-cultured together with NIH-Venus or NIH-Kit or NIH-KitK623M detected by intracellular flow cytometry. Gating shows Ki67<sup>+</sup> cells (N=8 for all conditions, two experiments). Bars show mean $\pm$ s.e.m. *P* value is shown (Student's t-test).
- (f)** Percentage of Ki67<sup>+</sup> NIH3T3 cells co-cultured together with NIH-Venus or NIH-Kit or NIH-KitK623M detected by intracellular flow cytometry. Gating shows Ki67<sup>+</sup> cells (N=8 for all conditions, two experiments). Bars show mean $\pm$ s.e.m. with NIH-Venus mean = 100 *P* value is shown (Student's t-test).

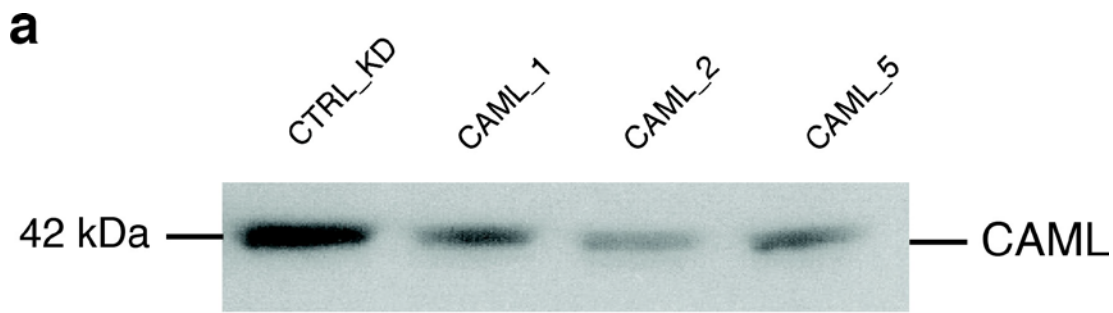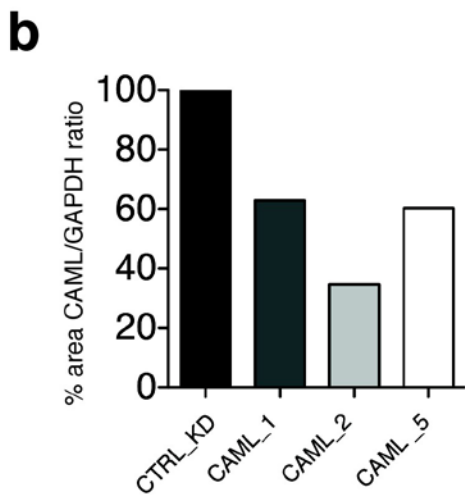

### Supplementary Figure 3

Supplementary Figure 3: Measurement of CAML knockdown efficiency.

- (a)** CAML western blot analysis of NIH3T3 transduced with control and CAML lentiviral vectors.
- (b)** Quantification of CAML lentiviral knockdown. The graph represents the ratio between the areas of CAML and GAPDH western blot bands relative to control virus infected cells. Cells transduced with the CAML\_2 shRNA were used for subsequent studies.

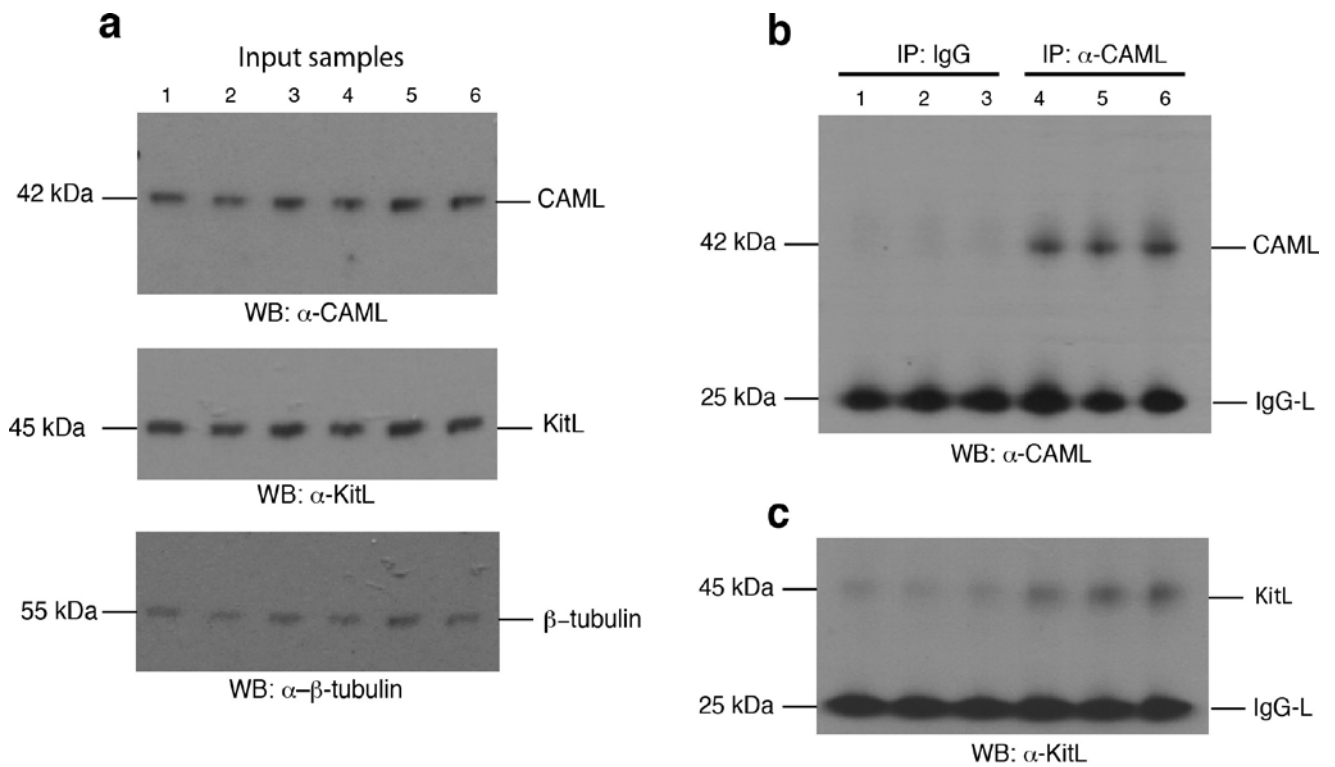

## Supplementary Figure 4

Supplementary Figure 4: CAML-KitL co-immunoprecipitation.

- (a)** Western blot analysis of CAML (upper panel), KitL (central panel) and  $\beta$ -tubulin (bottom panel) input protein (N=3).
- (b)** Western blot analysis of CAML (upper panel) and KitL protein immuno-precipitated by control IgG (IP: IgG, N=3) and by anti-CAML antibody (IP:  $\alpha$ -CAML, N=3) as indicated.

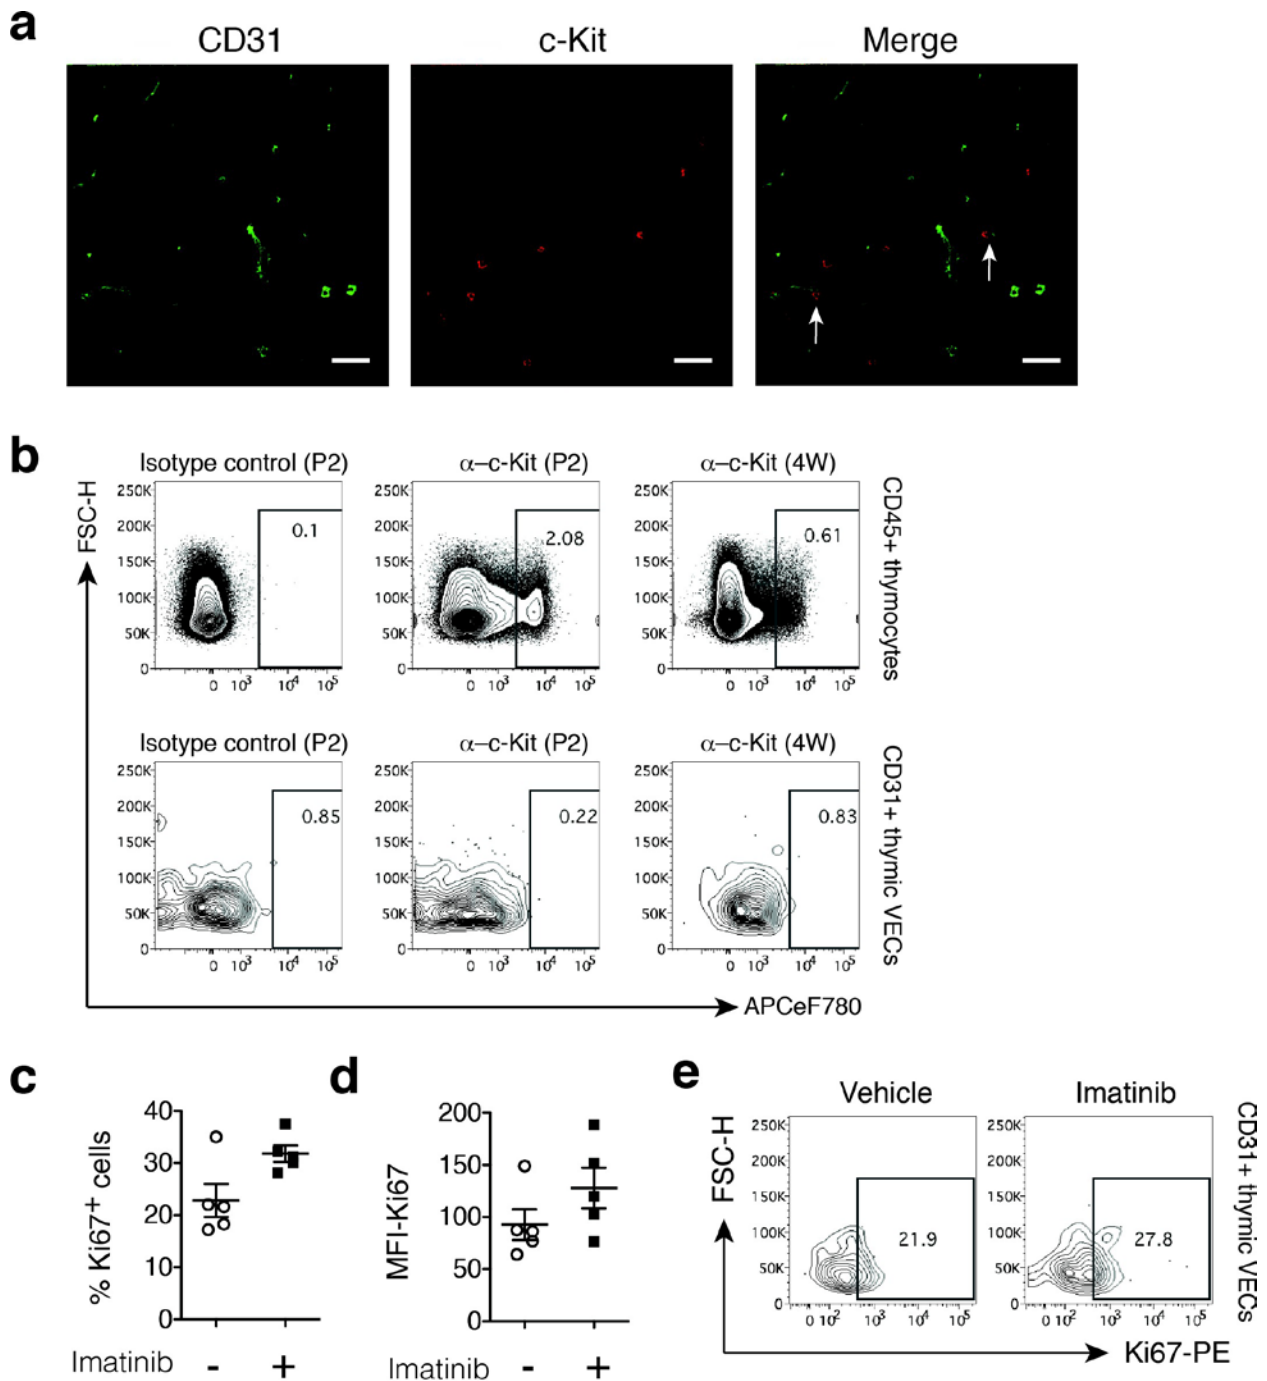

## Supplementary Figure 5

Supplementary Figure 5: c-Kit expression on thymic CD45+ cells and CD31+ VECs.

(a) Representative immunofluorescence analysis of CD31 (green) and c-Kit (red) expression in 4-weeks old thymus. Scale bar: 100 $\mu$ m. Note the lack of c-Kit-CD31 co-localization.

- (b)** Expression of c-Kit on CD45<sup>+</sup> thymocytes, gated as in Supplementary Fig 6, from postnatal day 2 (P2; middle panel) and 4 weeks old thymi (right panel). The isotype control staining from P2 thymus is shown for gating purposes (upper panels).  
Expression of c-Kit on CD31<sup>+</sup> thymic VECs, gated as in Supplementary Fig 6, from postnatal day 2 (P2; middle panel) and 4-weeks old thymi (right panel). The isotype control staining from P2 thymus is shown for gating purposes (lower panels).
- (c)** Percentage of Ki67<sup>+</sup> cells in in thymic VECs from 4-weeks old mice, co-cultured with NIH-Kit cells and NIH-Kit cells in the presence of 10  $\mu$ M Imatinib for 24 hours. (N=5 for both conditions, two experiments). Bars show mean $\pm$ s.e.m. *P* values were determined using Student's t-test and were not significant.
- (d)** Mean fluorescence intensity (MFI) of Ki67 signal in samples from (c). Bars show mean $\pm$ s.e.m. with NIH-Kit mean (w/o Imatinib) = 100. *P* values were determined using Student's t-test and were not significant..
- (e)** Representative flow cytometric analysis of Ki67 expression in thymic VECs from (c). Plots are representative of two experiments.

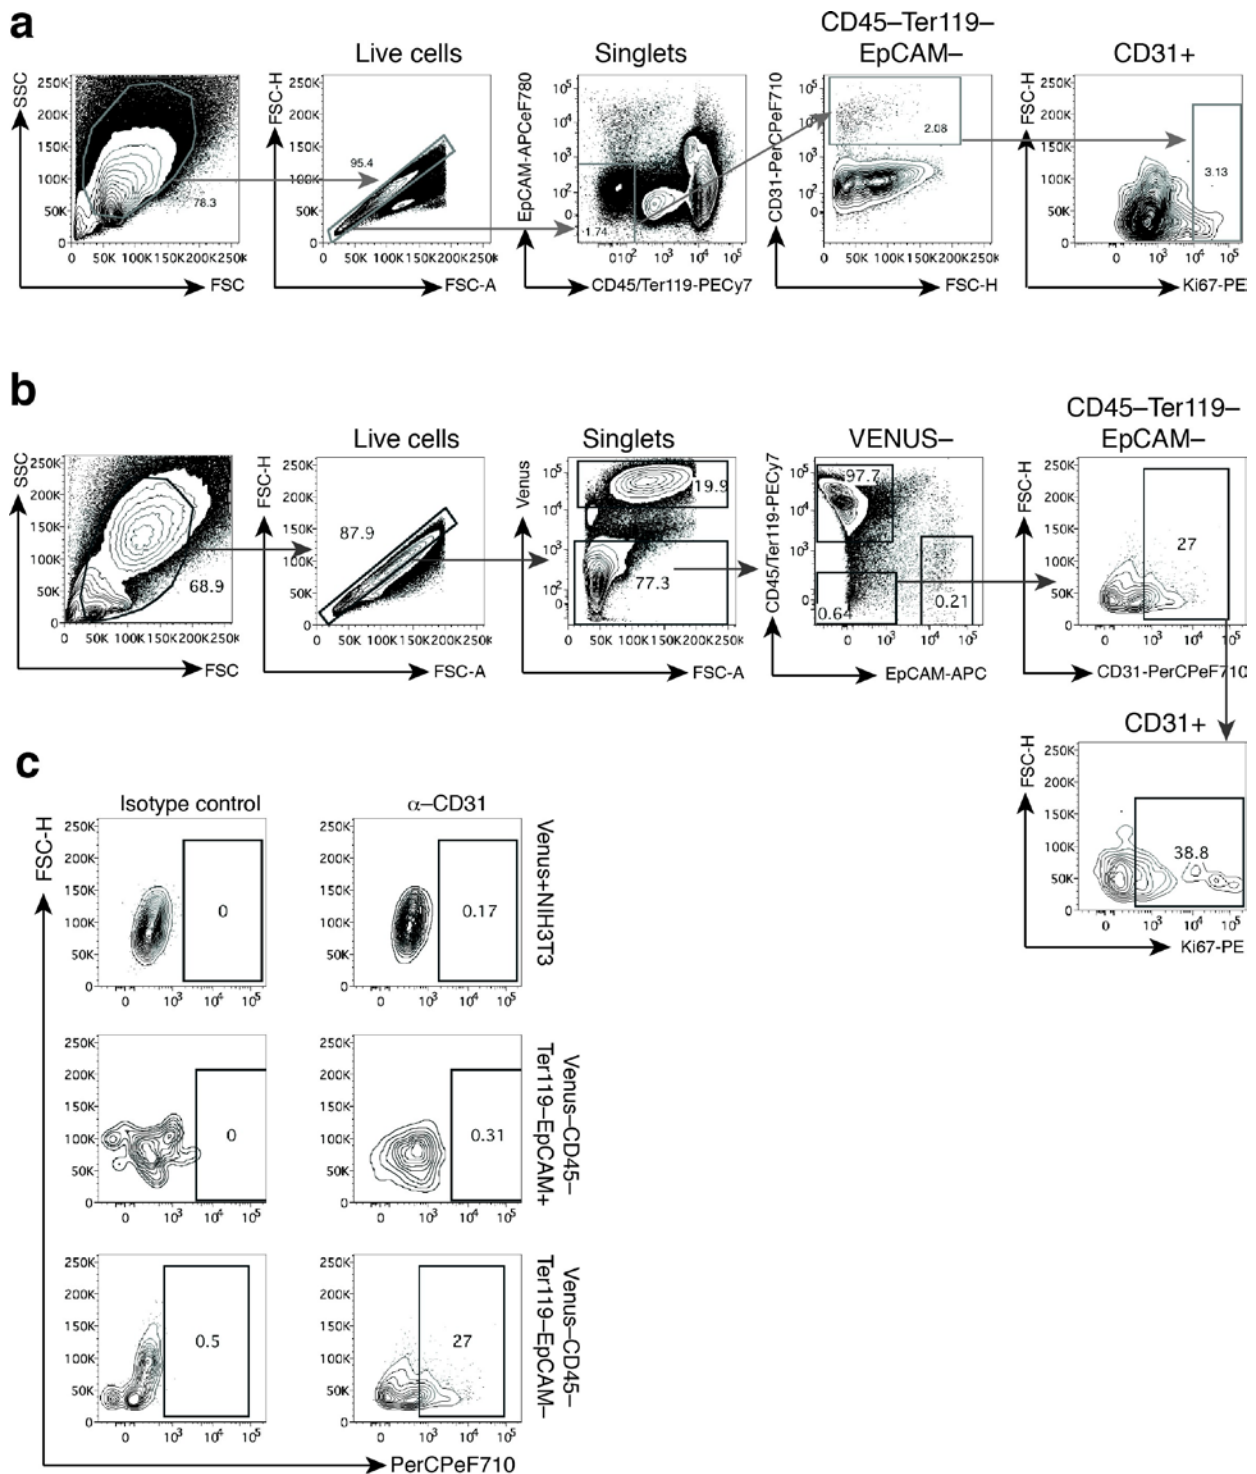

Supplementary Figure 6

Supplementary Figure 6: Gating strategy for thymic VEC identification.

(a) Gating strategy used to identify thymic VECs (CD45-Ter119-EpCAM-CD31+) and measurement of Ki67 expression *in vivo* shown in Figure 5e,f and Figure 6a,b.



- (b)** Gating strategy used to identify thymic VECs (Venus–CD45–Ter119–EpCAM–CD31+) and measurement of Ki67 expression in NIH3T3 co-culture experiment showed in Figure 6c,d,e) and Supplementary Figure 6c,d,e.
- (c)** Gating strategy of Venus+NIH3T3, Venus-CD45-Ter119-EpCAM+ and Venus-CD45-Ter119-EpCAM- to check for the specificity of the CD31 antibody against its specific isotype control (applies to Figure 5e,f and Figure 6a,b).

**Supplementary Table 1:** Positive hits in yeast two-hybrid screen using the KitL ICD as bait. In addition to the gene symbol of each positive hit the number of independent isolates, the cDNA start site and gene description is listed.

| Prey gene symbol | Number of times isolated | Start in 5'UTR | Start in coding sequence | Number of bases of the 5'UTR that are part of the hybrid prey protein | Description                                                                 |
|------------------|--------------------------|----------------|--------------------------|-----------------------------------------------------------------------|-----------------------------------------------------------------------------|
| APOE             | 12                       | 0              | 12                       | 0                                                                     | apolipoprotein E                                                            |
| GIMAP4           | 6                        | 0              | 6                        | 0                                                                     | GTPase, IMAP family member 4                                                |
| ASAP1-IT1        | 2                        | 0              | 2                        | 0                                                                     | ASAP1-IT1 ASAP1 intronic transcript 1 (non-protein coding) [ Homo sapiens ] |
| POLG2            | 2                        | 0              | 2                        | 0                                                                     | polymerase (DNA directed), gamma 2, accessory subunit                       |
| TTC1             | 2                        | 0              | 2                        | 0                                                                     | tetratricopeptide repeat domain 1                                           |
| XKRY             | 1                        | 1              | 0                        | 243                                                                   | XK, Kell blood group complex subunit-related, Y-linked                      |
| XKRY2            | 1                        | 1              | 0                        | 243                                                                   | XK, Kell blood group complex subunit-related, Y-linked 2                    |
| CAMLG            | 1                        | 1              | 0                        | 77                                                                    | calcium modulating ligand                                                   |
| C2orf77          | 1                        | 0              | 1                        | 0                                                                     | chromosome 2 open reading frame 77                                          |
| C8orf71          | 1                        | 0              | 1                        | 0                                                                     | chromosome 8 open reading frame 71                                          |
| PPIA             | 1                        | 0              | 1                        | 0                                                                     | peptidylprolyl isomerase A (cyclophilin A)                                  |
| PAPOLA           | 1                        | 0              | 1                        | 0                                                                     | poly(A) polymerase alpha                                                    |

**Supplementary Table 2:** List of antibodies used, including their application, working concentration, manufacturer and, where relevant, clone number.

| <b>Antibodies used for the study</b>                           |                      |                                     |                     |                              |
|----------------------------------------------------------------|----------------------|-------------------------------------|---------------------|------------------------------|
| <b>Antibody</b>                                                | <b>Application</b>   | <b>Working concentration/Volume</b> | <b>Manufacturer</b> | <b>clone</b>                 |
| Goat anti mouse SCF biotin                                     | FACS, neutralization | 5 µg/ml; 2 µg/ml                    | R&D systems         | BAF455                       |
| c-Kit APCef780                                                 | FACS                 | 0.25 µg/ml                          | eBioscience         | 2B8                          |
| Anti Human and Mouse Ki67 PE                                   | FACS                 | 1 in 25 dilution                    | Miltenyi Biotech    | REA183                       |
| Anti BrdU eF50                                                 | FACS                 | 2.5 µg/ml                           | eBioscience         | BU20A                        |
| Phospho-AKT1 (Ser473) APC                                      | FACS                 | 1 in 20 dilution                    | CST                 | monoclonal antibody SDRNR    |
| Phospho-mTOR (Ser2448) eFluor 450                              | FACS                 | 1 in 20 dilution                    | CST                 | monoclonal antibody MRRBY    |
| Phospho-S6 (Ser235, Ser236) PECy7                              | FACS                 | 1 in 20 dilution                    | CST                 | monoclonal antibody cupk43k  |
| Phospho-CREB (Ser133)                                          | FACS, WB, IF         | 1 in 20 dilution; 1:500; 1:100      | CST                 | 87G3; Rabbit monoclonal      |
| Normal Goat IgG Biotinylated Control                           | FACS, neutralization | 5 µg/ml; 2 µg/ml                    | R&D systems         | BAF108                       |
| CD45 PECy7                                                     | FACS                 | 0.33 µg/ml                          | eBioscience         | 30-F11                       |
| Ter-119 PECy7                                                  | FACS                 | 0.33 µg/ml                          | eBioscience         | TER-119                      |
| CD31 PerCP eF710                                               | FACS                 | 0.8 µg/ml                           | eBioscience         | 390                          |
| EpCAM APC eFluor780                                            | FACS                 | 0.5 µg/ml                           | eBioscience         | G8.8                         |
| Sptreptavidin PE                                               | FACS                 | 1 µg/ml                             | eBioscience         |                              |
| polyclonal anti CAML (sc-13970)                                | WB, IP               | 0.4 µg/ml; 2 µg/ml                  | SCBT                | discontinued?                |
| Phospho-AKT1 (Ser473) Antibody                                 | WB                   | 2 µl/ml                             | CST                 | #9271; Rabbit polyclonal     |
| AKT1 Antibody                                                  | WB                   | 2 µl/ml                             | CST                 | 2H10; Mouse monoclonal       |
| Phospho-p44/42 MAP Kinase (ERK1/2) (Thr202/Tyr204)             | WB                   | 1 µl/ml                             | CST                 | D13.14.4E; Rabbit monoclonal |
| p44/42 MAP Kinase (ERK1/2)                                     | WB                   | 1 µl/ml                             | CST                 | L34F12; Mouse monoclonal     |
| CREB1                                                          | WB                   | 2 µl/ml                             | CST                 | 86B10; Mouse monoclonal      |
| Phospho-c-Kit/CD117 pTyr730 Antibody                           | WB                   | 1 in 200 dilution                   | Thermo Scientific   | polyclonal rabbit antibody   |
| Human/Mouse CD117/c-kit Antibody                               | WB                   | 0.1 µg/ml                           | R&D systems         | AF1356 Polyclonal Goat IgG   |
| CD3εAPC/Lineage cocktail ETPs staining                         | FACS                 | 2 µg/ml                             | eBioscience         | Rat monoclonal               |
| Mac1 APC/Lineage cocktail ETPs staining                        | FACS                 | 0.5 µg/ml                           | eBioscience         | Rat monoclonal M1/70         |
| TCRβ APC/Lineage cocktail ETPs staining                        | FACS                 | 0.125 µg/ml                         | eBioscience         | Rat monoclonal H57-597       |
| Gr1 APC/Lineage cocktail ETPs staining                         | FACS                 | 0.5 µg/ml                           | eBioscience         | Rat monoclonal RB6-8C5       |
| Nk1.1 APC/Lineage cocktail ETPs staining                       | FACS                 | 0.25 µg/ml                          | eBioscience         | Rat monoclonal Pk136         |
| TCRγδ APC/Lineage cocktail ETPs staining                       | FACS                 | 0.5 µg/ml                           | eBioscience         | Rat monoclonal eBioGL3       |
| CD11c APC/Lineage cocktail ETPs staining                       | FACS                 | 0.25 µg/ml                          | eBioscience         | Rat monoclonal HL3           |
| Ter119 APC/Lineage cocktail ETPs staining                      | FACS                 | 1 µg/ml                             | eBioscience         | Rat monoclonal TER-119       |
| B220 APC/Lineage cocktail ETPs staining                        | FACS                 | 2 µg/ml                             | eBioscience         | Rat monoclonal RA3-6B2       |
| CD4 Alexa Fluor 700/ETPs staining                              | FACS                 | 0.25 µg/ml                          | eBioscience         | Rat monoclonal RMA-5         |
| CD8a PEcy7/ETPs staining                                       | FACS                 | 0.25 µg/ml                          | eBioscience         | Rat monoclonal 53.6.7        |
| c-Kit APCef780/ETPs staining                                   | FACS                 | 0.25 µg/ml                          | eBioscience         | Rat monoclonal 2B8           |
| CD25 PerCP cy5.5/ETPs staining                                 | FACS                 | 2 µg/ml                             | eBioscience         | Rat monoclonal PC61.5        |
|                                                                |                      |                                     |                     |                              |
|                                                                |                      |                                     |                     |                              |
| <b>Secondary antibodies</b>                                    |                      |                                     |                     |                              |
| Goat anti-Rabbit IgG (H+L) Secondary Antibody, Alexa Fluor 488 | IF, FACS             | 1 µl/ml; 5 µl/ml                    | Thermo Scientific   | R37116                       |
| Goat anti rabbit HRP                                           | WB                   | 0.3 µl/ml                           | Thermo Scientific   |                              |
| Goat anti mouse HRP                                            | WB                   | 0.5 µl/ml                           | Thermo Scientific   |                              |
| Protein A HRP                                                  | WB                   | 1 µl/ml                             | CST                 |                              |

**Supplementary Table 3:** The hairpin vectors used for CAML knockdown. The catalogue number, supplier, vector and hairpin sequences are listed.

| Hairpin number | Catalog Number    | Supplier  | Vector Name |
|----------------|-------------------|-----------|-------------|
| 1              | RMM4431-98920146  | Dharmacon | pGIPZ       |
| 2              | RMM4431-101228193 | Dharmacon | pGIPZ       |
| 5              | RMM4431-101232062 | Dharmacon | pGIPZ       |

#### Hairpin Sequence

TGCTGTTGACAGTGAGCGACGTCTACTTCTTCACCTTCATTAGTGAAGCCACAGATGTAATGAAGGT  
GAAGAAGTAGACGCTGCCTACTGCCTCGGA

TGCTGTTGACAGTGAGCGCAAGCCACAGGACAGTGACAAATAGTGAAGCCACAGATGTATTTGTCA  
CTGTCCTGTGGCTTTTGCCTACTGCCTCGGA

TGCTGTTGACAGTGAGCGAAGGGTAGTGCTTGGTGATTCATAGTGAAGCCACAGATGTATGAATCAC  
CAAGCACTACCCTCTGCCTACTGCCTCGGA

**Supplementary Table 4:** The chemicals and drugs used, including manufacturer and working concentrations.

| <b>Chemicals</b>                | <b>Manufacturer</b>     | <b>Working concentration/dilution</b> |
|---------------------------------|-------------------------|---------------------------------------|
| BrdU labeling reagent (00-0103) | Thermofisher/Invitrogen | 5 $\mu$ l/ml                          |
| Akti1/2                         | TOCRIS                  | 20 $\mu$ M                            |
| 666-15                          | TOCRIS                  | 1 $\mu$ M                             |
| Imatinib                        | CST                     | 10 $\mu$ M                            |
